# Supplementary material for: MAP7 family proteins regulate kinesin-1 recruitment and activation
Source: PubMed Central journal article supplement (PMC6446838; doi:10.1083/jcb.201808065), 2019-02-15
Supplement: JCB_201808065_sm.pdf [file JCB_201808065_sm.pdf]

## Supplemental material

Hooikaas et al., <https://doi.org/10.1083/jcb.201808065>

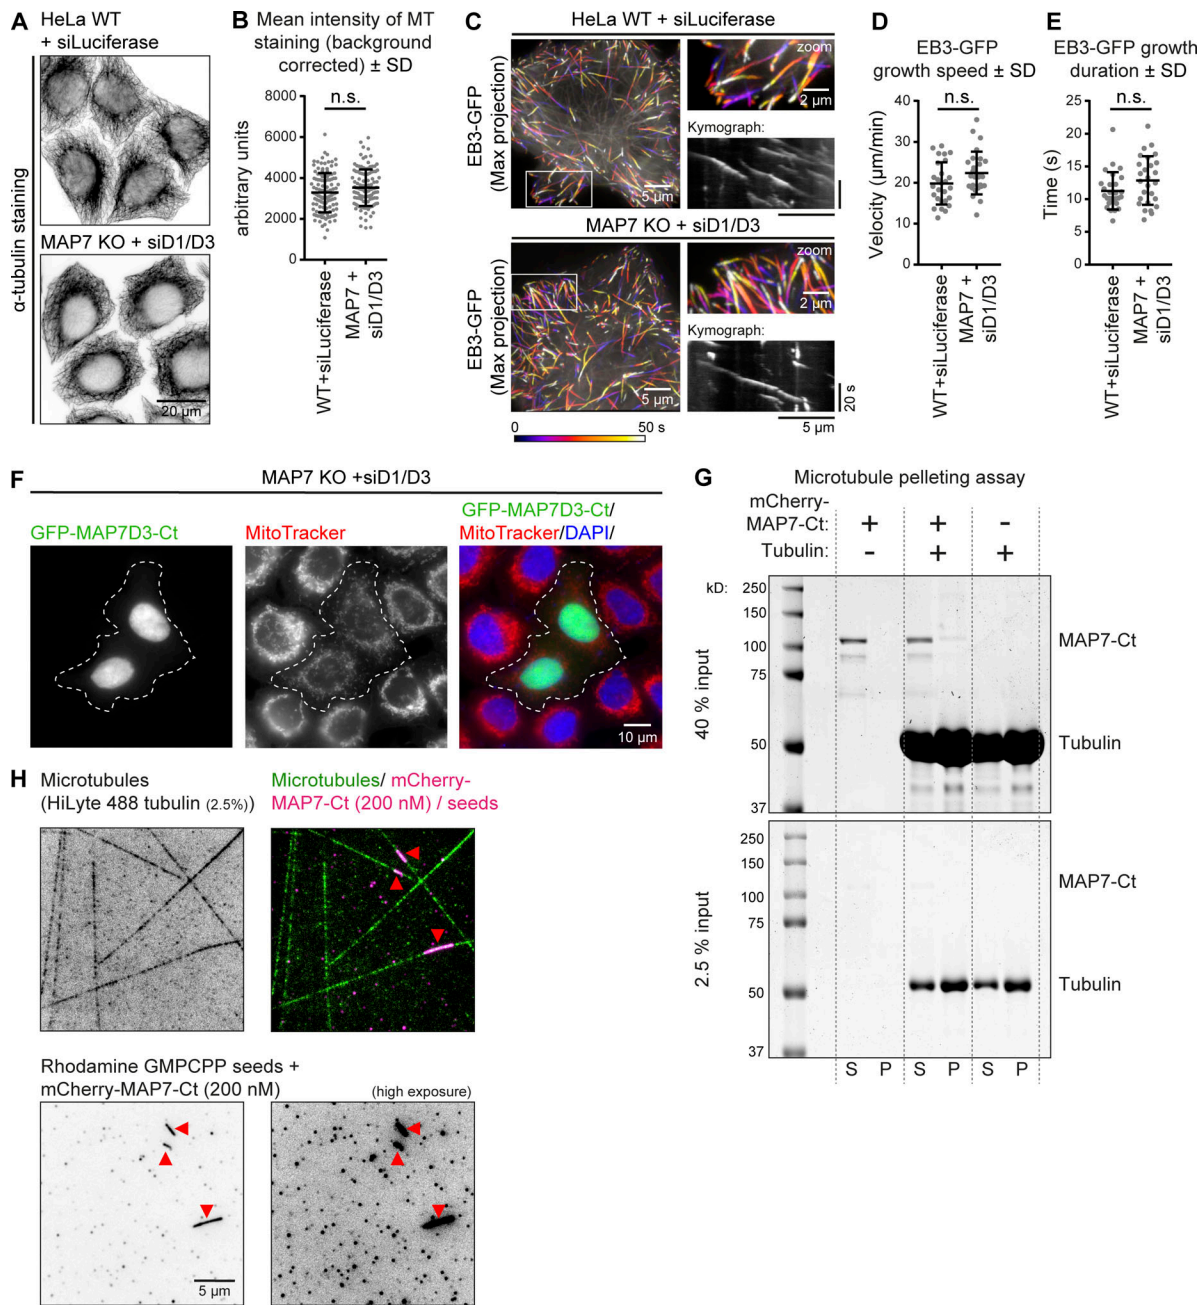

**Figure S1. Effects of the depletion MAP7 family proteins on the MT network and characterization of their MT-binding domains. (A and B)** Control or MAP7 knockout (KO) + siMAP7D1/D3 HeLa cells were stained for  $\alpha$ -tubulin and imaged on a widefield microscope (A) to quantify MT intensity per cell (B);  $n = 123$  cells (WT + siLuciferase) and  $n = 115$  cells (MAP7 KO + siMAP7D1/D3) from three independent experiments,  $P = 0.054$ ,  $t$  test. **(C)** Live-cell imaging of EB3-GFP in control or MAP7 KO + siMAP7D1/D3 HeLa cells on a TIRF microscope. Color-coded maximum intensity projections, zooms of the white boxed area, and illustrative kymographs of growing EB3-GFP comets are shown per condition. **(D and E)** Quantification of EB3-GFP dynamics: growth rate (D) and growth duration (E).  $n = 358$  comets from 27 cells (WT + siLuciferase) and  $n = 289$  comets from 27 cells (MAP7 KO + siMAP7D1/D3) from three independent experiments; (D)  $P = 0.078$  and (E)  $P = 0.138$  (Mann-Whitney  $U$  test). **(F)** Widefield images of overexpressed GFP-MAP7D3-Ct in MAP7 KO + siMAP7D1/D3 HeLa cells stained with MitoTracker and DAPI to visualize mitochondria and nuclei. **(G)** Unprocessed Coomassie blue-stained SDS-PAGE gel of the MT pelleting assay shown in Fig. 2 B. Two gels were loaded with different input quantities (40% and 2.5% of total samples). The positions of tubulin and mCherry-MAP7-Ct truncation on the gel are indicated on the right. **(H)** Images showing in vitro polymerized MTs, with HiLyte 488-labeled tubulin, rhodamine-labeled MT seeds, and mCherry-MAP7-Ct. Images were obtained on a TIRF microscope. Rhodamine-labeled GMPCPP-stabilized MT seeds are indicated by arrowheads. The mCherry-MAP7-Ct image (also showing MT seeds) is shown on the right with linearly increased brightness/contrast (ImageJ software).

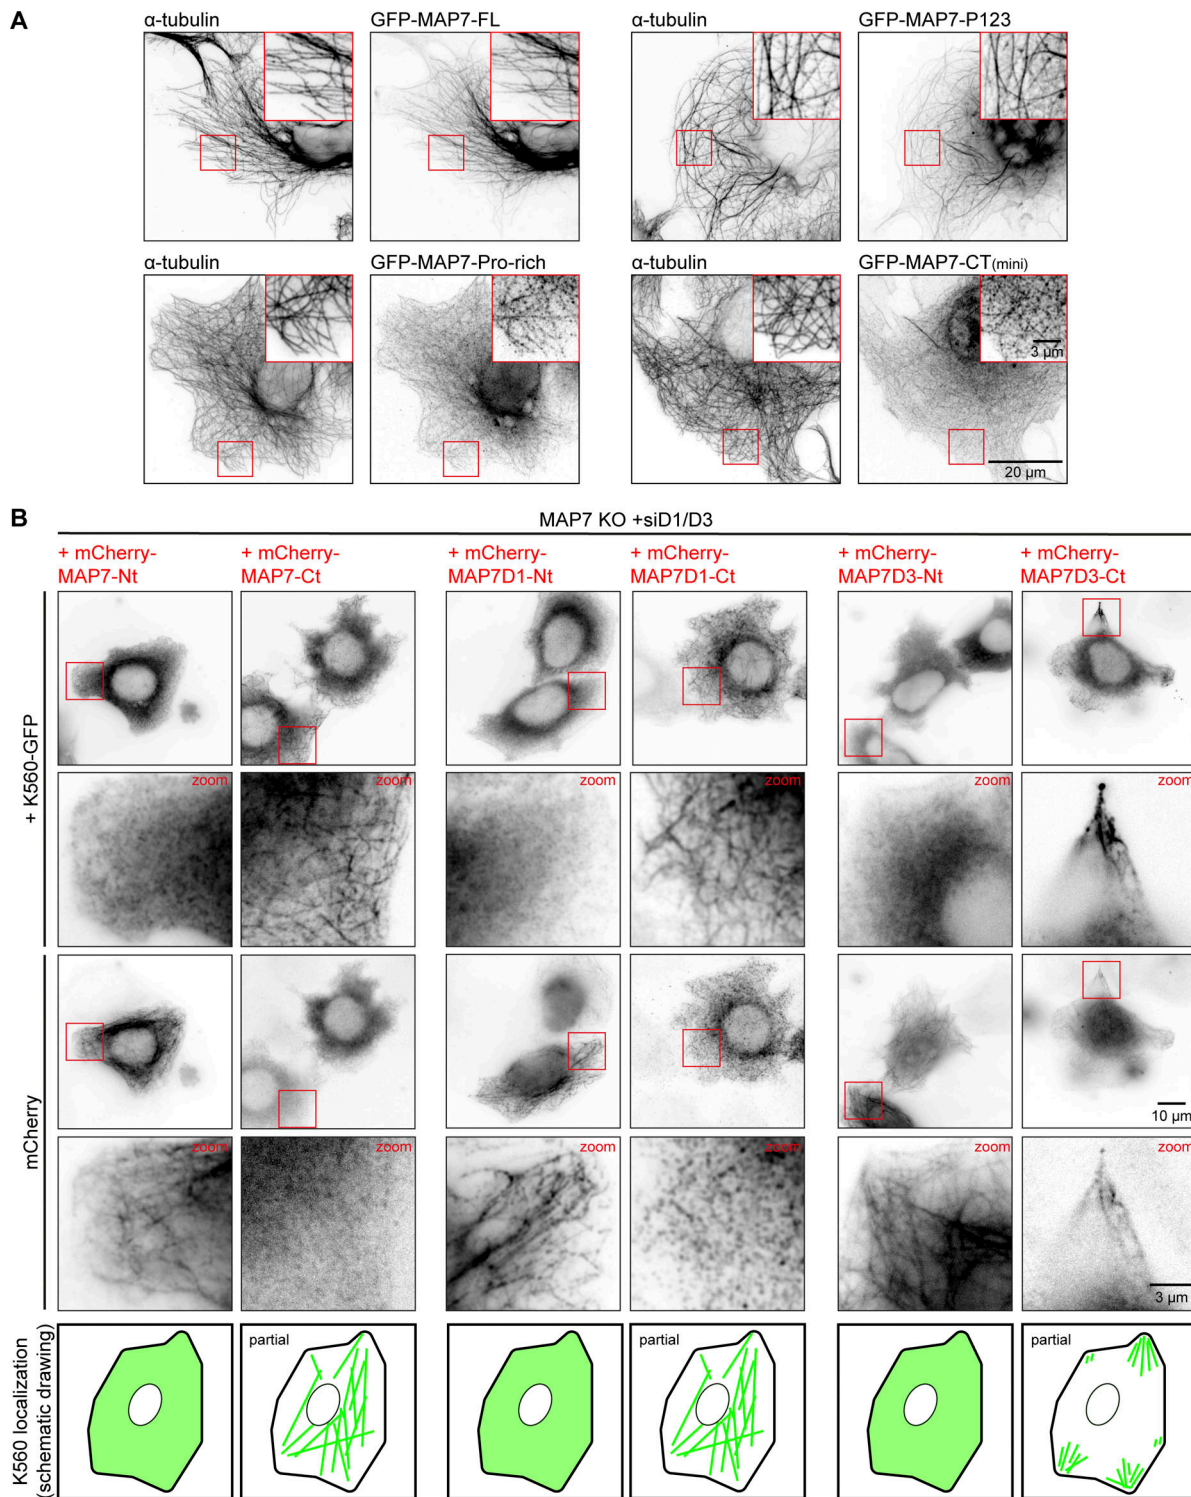

Figure S2. **Kinesin-1 recruitment to MTs by the C termini of MAP7 family proteins.** (A) COS7 cells overexpressing indicated GFP-tagged MAP7 constructs costained for  $\alpha$ -tubulin. Zooms are indicated with red boxes. (B) Widefield images of MAP7 KO + siMAP7D1/D3 HeLa cells overexpressing K560-GFP with mCherry-tagged MAP7 N- and C-terminal constructs. Enlargements of images indicated with a red squared box are shown in the panel row below. A schematic and representative drawing of K560-GFP localization for each condition is shown at the bottom. KO, knockout.

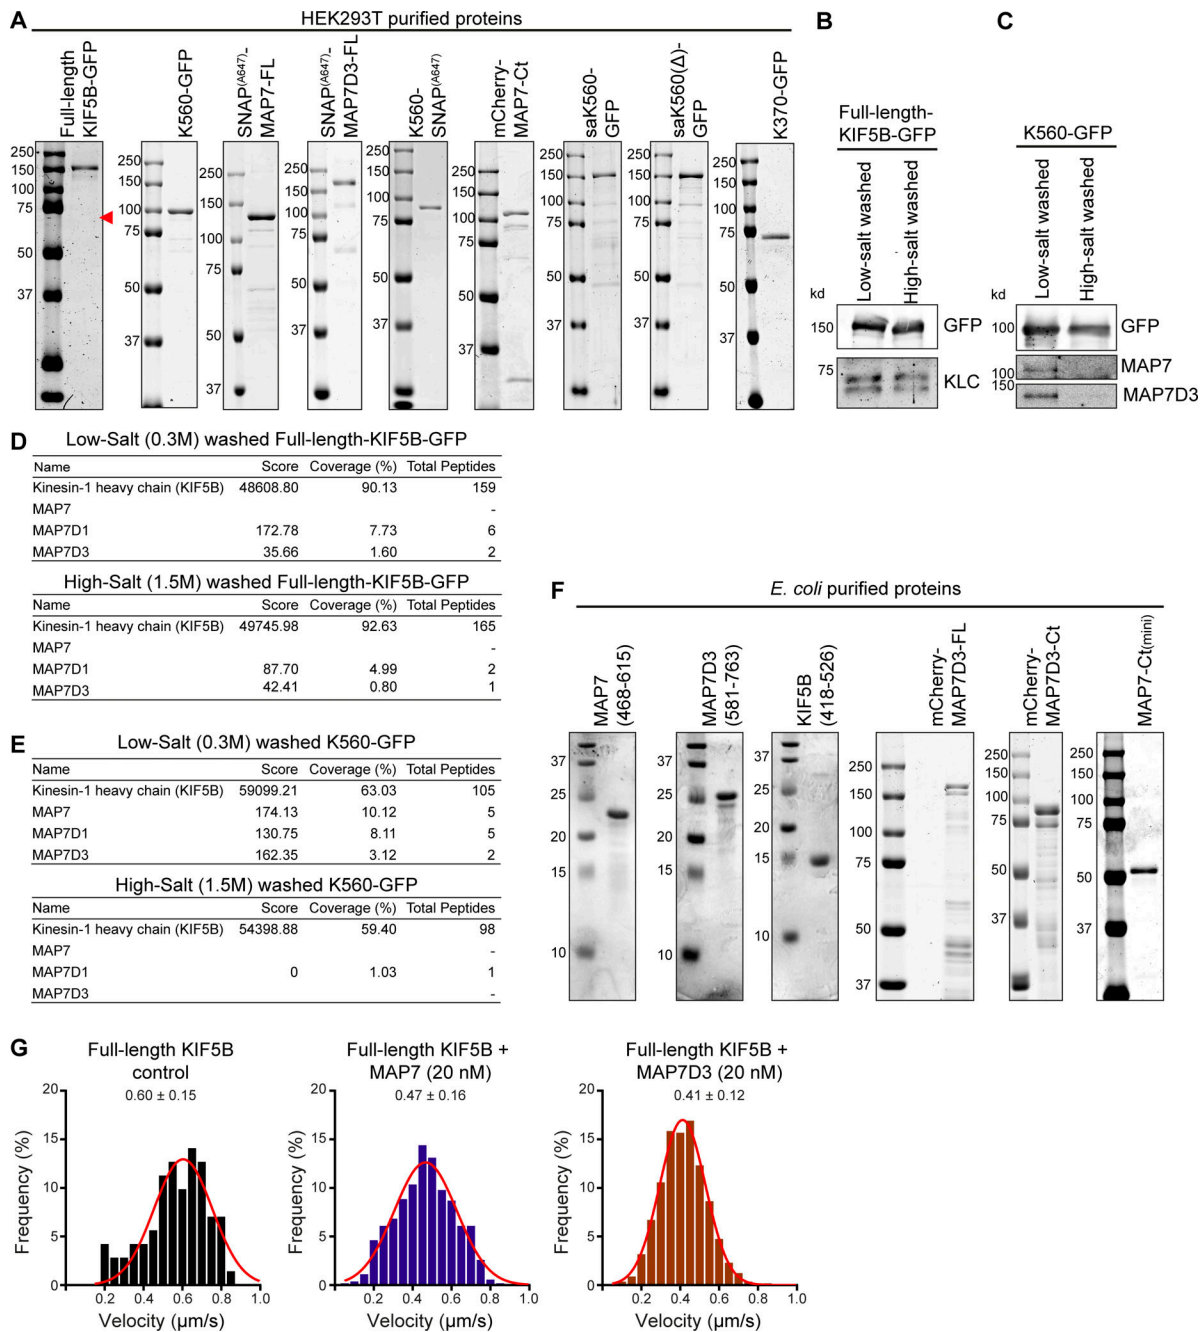

Figure S3. **Overview and analysis of purified proteins.** (A) Proteins purified from HEK293T cells used in this study analyzed by SDS-PAGE. (B and C) Western blot analysis of purified kinesins washed with low- (0.3 M) or high-salt (1.5 M NaCl) buffer. Antibodies against GFP, kinesin light chain-1 (KLC), MAP7, and MAP7D3 were used; GFP serves as a loading control for both experiments. (D and E) Mass spectrometry analysis of purified kinesins washed with low- (0.3 M) or high-salt (1.5 M NaCl) buffer. (F) Proteins purified from *E. coli* used in this study were analyzed by SDS-PAGE. (G) Histograms of full-length kinesin-1 velocities in control conditions or in the presence of 20 nM MAP7 or MAP7D3. Red lines show fitting with Gaussian distributions; mean values ± SD are indicated in the plot.  $n = 71$  (control),  $n = 542$  (MAP7), and  $n = 568$  (MAP7D3) from two or three independent experiments.

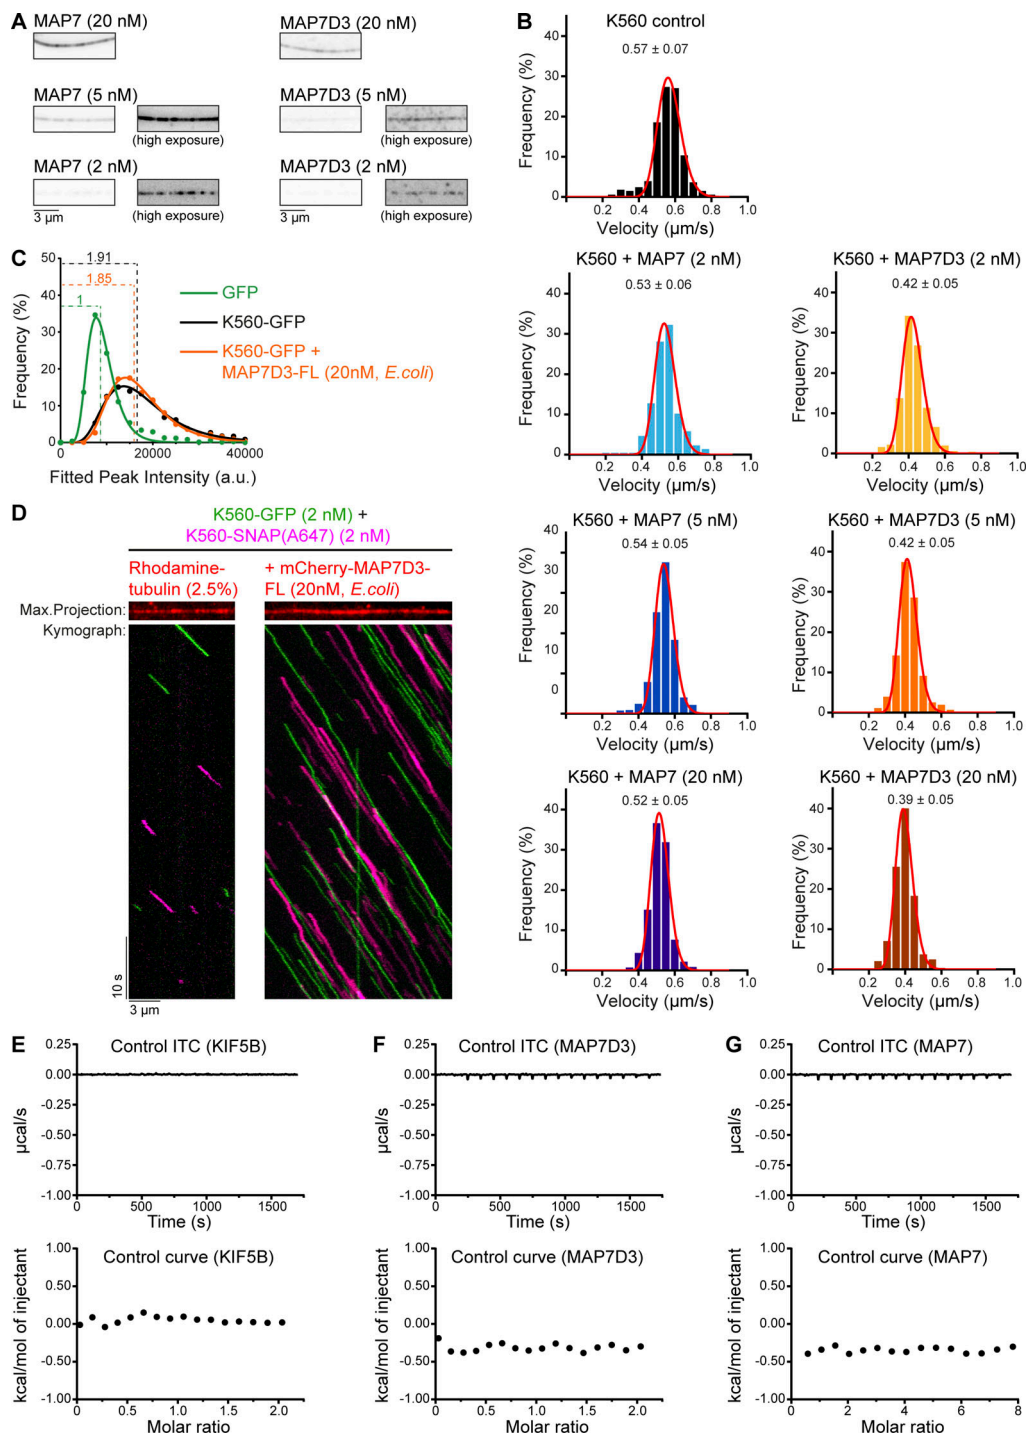

Figure S4. **Velocities and oligomerization state of kinesin constructs in different conditions.** (A) Images showing increasing concentrations of SNAP(Alexa Fluor 647)-tagged MAP7 or MAP7D3 on dynamic MTs in vitro. Images were obtained with identical laser power and exposure time on a TIRF microscope. Panels on the right show replicate images from the left with linearly increased brightness/contrast (ImageJ software). (B) Histograms of K560-GFP velocities in control conditions or in the presence of indicated proteins. Red lines show fitting with Gaussian distributions; mean values with standard deviation are indicated in the plot.  $n = 241$  (control),  $n = 351$  (MAP7, 2 nM),  $n = 614$  (MAP7, 5 nM),  $n = 361$  (MAP7, 20 nM),  $n = 257$  (MAP7D3, 2 nM),  $n = 436$  (MAP7D3, 5 nM), and  $n = 303$  (MAP7D3, 20 nM) from two independent experiments. (C) Histograms of fluorescence intensities of single GFP molecules (immobilized on coverslips) and K560-GFP moving on MTs with or without mCherry-MAP7D3-FL (purified from *E. coli*) in two separate chambers on the same coverslip (dots) and the corresponding fits with lognormal distributions (lines).  $n = 858$  (GFP),  $n = 1640$  (K560-GFP), and  $n = 4137$  molecules (K560-GFP + mCherry-MAP7D3-FL). Fluorophore density was  $\sim 0.01 \mu\text{m}^{-2}$  for GFP. K560-GFP proteins were analyzed from 2 to 10 MTs per movie. Dashed lines show corresponding relative median values. (D) Representative kymographs of 1:1 mixed K560-GFP (green) and K560-SNAP(Alexa Fluor 647) (magenta) moving on dynamic MTs with or without mCherry-MAP7D3-FL (purified from *E. coli*). Maximum intensity projections show rhodamine-labeled MTs (control) or mCherry-MAP7D3-FL labeled MTs in red. (E-G) Control ITC experiments of KIF5B, MAP7D3, and MAP7. Top: Enthalpograms of the respective titrations. Bottom: Black dots represent the integrated heat change.

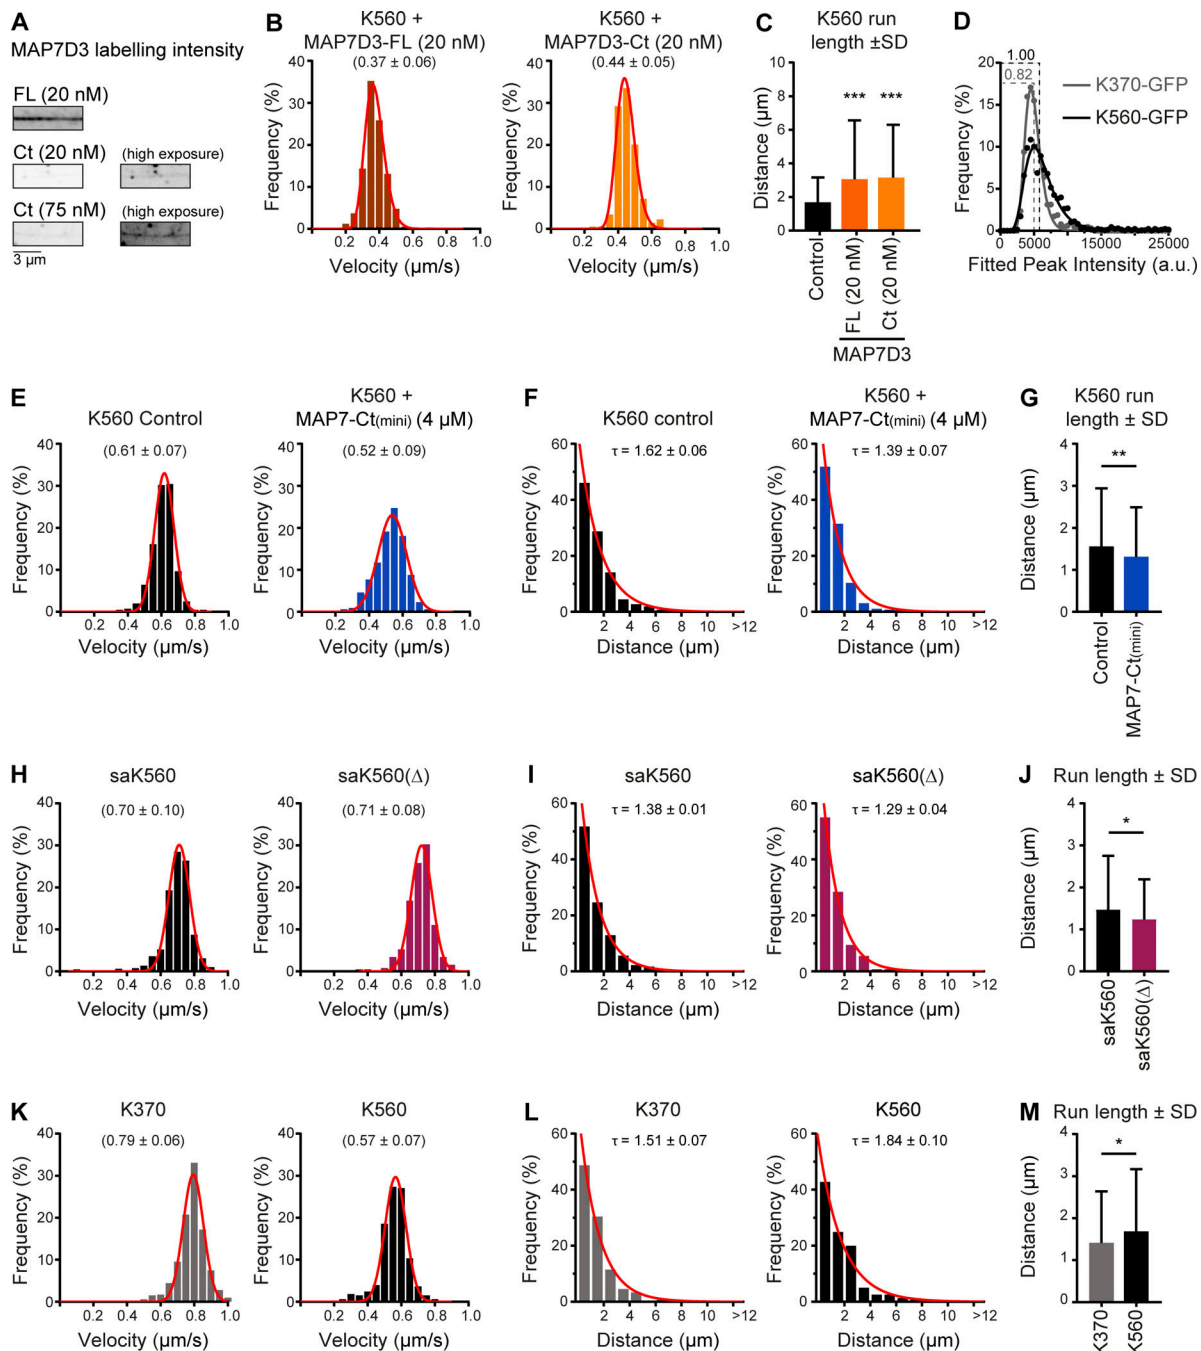

Figure S5. **Kinesin motility parameters.** (A) Images showing increasing concentration of mCherry-tagged MAP7D3 full-length (FL) or MAP7D3-Ct (purified from *E. coli*) on dynamic MTs in vitro. Images were obtained with identical laser power and exposure time on a TIRF microscope. Panels on the right show replicate images from the left with linearly increased brightness/contrast (ImageJ software). (B) Histograms of K560-GFP velocities in the presence of indicated MAP7D3 proteins (purified from *E. coli*). Red lines show fitting with Gaussian distributions; mean values with standard deviation are indicated in the plot.  $n = 271$  (MAP7D3-FL) and  $n = 209$  (MAP7D3-Ct). (C) Quantification of K560-GFP run length in control condition or in the presence of the indicated MAP7D3 proteins (purified from *E. coli*). \*\*\*  $P < 0.001$ , Mann-Whitney  $U$  test.  $n = 241$  (control),  $n = 271$  (MAP7D3-FL, 20 nM),  $n = 209$  (MAP7D3-Ct, 20 nM). (D) Histograms of fluorescence intensities of K370-GFP and K560-GFP motors moving on MTs in two separate chambers on the same coverslip (dots) and the corresponding fits with lognormal distributions (lines).  $n = 639$  (K370-GFP) and  $n = 1,337$  molecules (K560-GFP); motor proteins were analyzed from 2–10 MTs per movie. Dashed lines show corresponding relative median values. (E, H, and K) Histograms of kinesin velocities. Red lines show fitting with Gaussian distributions; mean values with standard deviation are indicated in the plot. (E)  $n = 404$  (control) and  $n = 648$  (MAP7-Ct(mini)); (H)  $n = 804$  (saK560) and  $n = 380$  (saK560( $\Delta$ )); (K)  $n = 723$  (K370) and  $n = 241$  (K560). (F, G, I, J, L, and M) Kinesin run lengths were quantified and are shown as a histogram distribution with a fitted exponential decay curve (red), with indicated rate constants ( $\tau$ ) as a measure of mean run length (F, I, and L) or with a bar graph (G, J, and M). \*\*  $P < 0.01$ ; \*  $P < 0.05$ , Mann-Whitney  $U$  test. Numbers ( $n$ ) correspond to those of the preceding panels showing kinesin velocities.

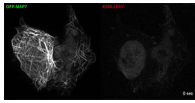

Video 1. **Imaging of light-induced nuclear export of K560-LEXY with GFP-MAP7.** Sequential dual-color video of GFP-MAP7 (left) and K560-mCherry-LEXY (right) in KIF5B KO HeLa cells. The video was acquired at 5 s per frame over the course of 4 min on a spinning disc confocal microscope setup. Video corresponds to [Fig. 4 D](#).

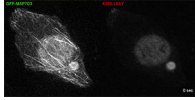

Video 2. **Imaging of light-induced nuclear export of K560-LEXY with GFP-MAP7D3.** Sequential dual-color video of GFP-MAP7D3 (left) and K560-mCherry-LEXY (right) in KIF5B KO HeLa cells. The video was acquired at 5 s per frame over the course of 4 min on a spinning disc confocal microscope setup. Video corresponds to [Fig. 4 G](#).
